# Quantifying eco-evolutionary contributions to trait divergence in spatially structured systems

Lynn Govaert<sup>1,2,3\*</sup>

Jelena H. Pantel<sup>1,4</sup>

Luc De Meester<sup>1</sup>

1. Laboratory of Aquatic Ecology, Evolution and Conservation, University of Leuven, Ch. Debe-  
riotstraat 32, B-3000 Leuven, Belgium;

2. Department of Evolutionary Biology and Environmental Studies, University of Zurich, Win-  
terthurerstrasse 190, CH-8057 Zürich, Switzerland;

3. Department of Aquatic Ecology, Swiss Federal Institute of Aquatic Science and Technology,  
Überlandstrasse 133, CH-8600 Dübendorf, Switzerland;

4. Department of Computer Science, Mathematics, and Environmental Science, The American  
University of Paris, 6 rue du Colonel Combes, 75007 Paris, France

\* Corresponding author; e-mail: [lynn.govaert@eawag.ch](mailto:lynn.govaert@eawag.ch)

*Manuscript elements:* Figure 1-6, also see online appendices A-F including Figure C1, D1 and  
F1-F8

*Keywords:* eco-evolutionary dynamics, partitioning metrics, spatial trait variation, population,  
trait change

## Abstract

2 Ecological and evolutionary processes can occur at similar time scales, and hence influence one  
another. There has been much progress in the development of metrics that quantify contributions  
4 of ecological and evolutionary components to trait change over time. However, many empirical  
evolutionary ecology studies document genetic differentiation among populations structured in  
6 space. In both time and space, the observed differentiation in trait values among populations and  
communities can be the result of interactions between non-evolutionary (phenotypic plasticity,  
8 changes in the relative abundance of species) and evolutionary (genetic differentiation among  
populations) processes. However, the tools developed so far to quantify ecological and evolu-  
10 tionary contributions to trait change are implicitly addressing temporal dynamics because they  
require directionality of change from an ancestral to a derived state. Identifying directionality  
12 from one site to another in spatial studies of eco-evolutionary dynamics is not always possible  
and often not desired. We here suggest three modifications to existing metrics so they allow  
14 the partitioning of ecological and evolutionary contributions to changes in population and com-  
munity trait values across landscapes. Applying these spatially modified metrics to published  
16 empirical examples shows how these metrics can be used to generate new empirical insights  
and to facilitate future comparative analyses. The possibility to apply eco-evolutionary partition-  
18 ing metrics to populations and communities in real landscapes is critical as it will broaden our  
capacity to quantify eco-evolutionary interactions as they occur in nature.

## 20 Introduction

22 During the past decade ecologists and evolutionary biologists have become increasingly aware  
24 that ecological and evolutionary processes can combine to structure populations and communi-  
ties (Hairston et al. 2005; Schoener 2011; Barraclough 2015; Hendry 2017). This has prompted  
26 development of a suite of metrics to describe and quantify eco-evolutionary contributions to  
numerous processes that were traditionally considered to result only from ecological dynamics  
28 (Hairston et al. 2005; Collins and Gardner 2009; Ellner et al. 2011; Govaert et al. 2016). These  
methods, however, have generally been developed for and applied to populations and communi-  
ties separated in time. For example, a study by Becks et al. (2012) used experimental chemostats  
30 to show that over a time period of 90 days evolutionary responses in the defense traits of an algal  
prey were more important to rotifer population growth than changes in algal abundance. To  
come to these conclusions they used an eco-evolutionary partitioning metric developed by Ellner  
32 et al. (2011). In another study, the same metric was used to compare the relative impact of an  
environmental change (dry or wet soil) and of plant evolutionary history (adaptation during 16  
34 months to a dry or wet environment) on soil microbial and fungal community diversity (terHorst  
et al. 2014). They found that rapid evolutionary responses of plant populations to drought are  
36 as important as the direct ecological effects of this stressor, indicating that ecological and evolu-  
tionary effects had similar magnitudes. Gómez et al. (2016) similarly found that pre-adaptation  
38 to elevated temperature for 48 days in *Pseudomonas fluorescens* contributed as much to change in  
taxon composition of a compost bacterial community as the presence of the species *P. fluorescens*  
40 itself.

While eco-evolutionary dynamic studies are mainly focused on reciprocal evolutionary and  
42 ecological changes over time, many evolutionary ecology studies of natural systems consider  
trait variation among geographically segregated patches and trait turnover along particular spa-  
44 tial gradients rather than over time. Spatial landscape heterogeneity plays a role in shaping ge-  
netic structure in natural populations (Ackerman et al. 2013), and the distribution of phenotypes

46 of local populations in space exposed to different environments may diverge through adaptive  
plasticity and local adaptation (Via and Lande 1985; Kawecki and Ebert 2004; Logan et al. 2016).  
48 Similarly, species sorting across the landscape might also occur when different environments are  
dominated by different competing species (Fox and Harder 2015). Therefore, spatially separated  
50 populations or communities may be structured by non-evolutionary (i.e. phenotypic plasticity  
and species sorting) and evolutionary processes. Quantifying these processes in spatial study  
52 systems may improve our understanding on how geographical, environmental and community  
features structure evolutionary and non-evolutionary contributions to trait variation in popula-  
54 tions and communities inhabiting natural landscapes.

As evolutionary trait change occurs over time, studies quantifying trait evolution often have a  
56 clear direction in the observed trait change from past to present. However, studies measuring trait  
divergence among spatially separated populations or communities capture the trait values of the  
58 species at a defined moment in time. While the observed trait divergence in these studies does  
reflect past evolutionary changes, information about past states is often not available. Whether all  
60 populations diverged from a common ancestor simultaneously or fragmented at various points  
throughout the past is unknown. In such instances, the goal may be to quantify the amount of  
62 trait divergence that can be attributed to evolutionary and non-evolutionary contributions, rather  
than to determine such contributions to trait change assuming a certain ancestry. However, some  
64 spatial study systems do imply a directed trait change among spatially separated populations or  
communities. For example, the direction of ancestry is known in studies that investigate invasion  
66 history (e.g. stickleback colonisation of freshwater lakes; Bell et al. 2004; Le Rouzic et al. 2011)  
or that look at range expansions where the peripheral population can be traced back to more  
68 central populations (e.g. Safriel et al. 1994; Volis et al. 2001; Swaegers et al. 2014). In some  
studies, ancestor-descendant relationships are assumed (e.g. Etterson and Shaw 2001). In these  
70 studies, eco-evolutionary partitioning metrics that quantify non-evolutionary and evolutionary  
components of temporal trait change can be used without modification.

72 To our knowledge, no study to date has partitioned population or community structure in

a spatially explicit scenario, even though spatial variation in traits, genes, and species composition across landscapes are central to studies that focus on ecological or evolutionary processes in isolation. The study of Norberg et al. (2012) considers spatially structured communities in a spatially explicit model, but still quantifies ecological and evolutionary contributions to temporal community trait change as opposed to spatial community trait divergence. The study of Pantel et al. (2015) modified the metric proposed by Hairston et al. (2005) and Ellner et al. (2011) to assess genetic and environmental contributions to measures of community composition (e.g. species richness, change in Simpson's diversity), and their experimental question and methods did not utilize a direction of change between communities. However, they did not explicitly quantify among-community trait variation in the contribution of evolutionary and ecological components. Questions such as whether the magnitude or relative importance of non-evolutionary and evolutionary effects is related to features of the organisms (e.g. generation time) or the landscape (e.g. degree of isolation or degree of habitat heterogeneity), or when populations and communities are more likely to respond to environmental change via shifts in the relative abundances of species, phenotypic plasticity, evolutionary change, or some combination of these is an important next step for studies of eco-evolutionary dynamics. However, in order to answer these questions, we need appropriate tools to quantify non-evolutionary and evolutionary contributions to population and community trait divergence among landscapes or experimental units.

Today, a handful of metrics is available to calculate non-evolutionary and evolutionary contributions to trait change such as the Price equation (Price 1970; Price 1972), metrics based on reaction norms (Hairston et al. 2005; Ellner et al. 2011; Govaert et al. 2016) and the recently developed Price-Reaction-Norm equation (Govaert et al. 2016). These metrics have previously been compared to one another, with differences in their set of assumptions highlighted (Govaert et al. 2016; Govaert 2018) and thus can provide a first step to explore modifications to spatial study systems. The goal of this study is to extend these eco-evolutionary partitioning metrics to assess how non-evolutionary and evolutionary processes, and their interactions, contribute to observed trait differentiation between spatially structured populations and communities. Specifically, our

100 study will address the large number of studies that do not seek to understand a change across a  
direction, but instead compare differentiation among groups. We develop modifications to exist-  
102 ing partitioning metric for temporal data and show that depending on these modifications, the  
assessment of the importance or the interpretation of the contributing ecological and evolution-  
104 ary processes may change. We then apply the modified metrics to selected empirical datasets to  
illustrate the diversity of research questions that can be addressed and how the here developed  
106 metrics can be used to facilitate comparative analyses and generate new empirical insights.

## Applying current metrics to spatially structured systems

108 Spatially separated populations and communities are structured by ecological and evolutionary  
processes that may result in trait differentiation among these populations and communities (Via  
110 and Lande 1985; Kawecki and Ebert 2004; Fox and Harder 2015; Logan et al. 2016). In order to  
quantify the relative importance of evolution as opposed to ecology in structuring spatial pop-  
112 ulations and communities, it is important to separate evolutionary change (at the species level)  
from phenotypic plasticity (at the individual level), and from ecological change (i.e. species sort-  
114 ing; at the community level). Each of these components contributes to phenotypic community  
trait change, and their effects are likely not independent from one another, implying that their  
116 interactions (e.g. evolution of plasticity, species sorting  $\times$  evolution) should be taken into ac-  
count as well. This general separation of components at different organisational levels is referred  
118 to as the ‘eco-evo sandwich’, where evolutionary change at the intermediate (species) organiza-  
tional level can interact with ecological processes at lower (individual) and higher (community)  
120 organizational levels (Fig. 1; modified from Govaert et al. 2016).

Most currently used eco-evolutionary partitioning metrics depend on the choice of the ref-  
122 erence point (Fig. 2A). Hence, the direction of change might alter the result of existing eco-  
evolutionary partitioning metrics that depend on direction. For example, applying current met-  
124 rics such as the Price equation or reaction norm approach to partition a trait shift between two

hypothetical populations of a single species shows that depending on the reference population  
126 chosen (i.e. partitioning trait shift from Population 1 to 2 or from Population 2 to 1) a differ-  
ent contribution of evolution is found (Fig. 3). This difference is an undesirable consequence  
128 of applying eco-evolutionary partitioning metrics that are designed to separate directional trait  
change to populations or communities for which there is no information on their ancestry. We  
130 therefore suggest three approaches, illustrated in Figure 2B, to modify current partitioning met-  
rics to quantify ecological and evolutionary processes to undirected trait shifts, typically assessed  
132 in spatial study systems. In subsequent sections, we provide formulae as well as demonstrative  
calculations for these modifications. We then apply these approaches to three empirical studies.

134 A first modification involves setting a common reference by constructing a midpoint such as  
the group mean. This is conceptually similar to using Helmert contrasts in regression analysis.  
136 This way we partition trait deviation for each site from the group mean into non-evolutionary  
and evolutionary processes (Fig. 2B). In the second modification, we quantify non-evolutionary  
138 and evolutionary contributions to directed trait change of both directions (treating each of the  
two sites in each pair as a reference), and then average the resulting fractions (Fig. 2B). In a third  
140 modification, we explore ways to mathematically adapt current eco-evolutionary partitioning  
metrics to become independent of the reference chosen. The metrics we propose can be applied  
142 to both population as well as community trait data, but we focus on the metrics applied to  
populations in the main text and provide their extension to community data in Appendix A.

## 144 **Price, reaction norm and Price-Reaction-Norm as applied to popula- tions**

146 Because our intention is to modify the metrics for non-directional comparisons, we first present  
the basic equations for the Price equation and the Reaction Norm approach for directional com-  
148 parisons (usually for two points in time). We exclude the Price-Reaction Norm approach from  
the main text as this is a combination of both the Price and Reaction Norm equation, but provide

150 the details for that equation in Appendix B.

The Price equation, introduced by G. R. Price (Price 1970; Price 1972), has been used to  
152 describe trait change in a biological population from one generation to the next. The Price  
equation is very versatile and has proven its usefulness in evolutionary biology (detailed in  
154 Queller 2017), ecology (Fox 2006; Fox and Kerr 2012), epidemiology (Day and Gandon 2006),  
and evolutionary ecology (Collins and Gardner 2009; Ellner et al. 2011; Govaert et al. 2016). We  
156 here use the version of the Price equation that partitions trait change between two time points  
in an asexually reproducing population consisting of  $N$  genetic lineages, uniquely indexed by  
158  $j \in \{1, \dots, N\}$  (Govaert et al. 2016). For this metric to apply, we require information on the  
relative abundance and average trait value for each lineage in each population at both time points.  
160 This metric then divides trait change between two time points into a component that gives the  
changes in the relative abundances of the lineages (i.e. lineage sorting) and a component that  
162 gives the trait change within lineages:

$$\Delta \bar{z} = \sum_{j=1}^N z_2^j (q_2^j - q_1^j) + \sum_{j=1}^N q_1^j (z_2^j - z_1^j). \quad (1)$$

In this equation,  $z_k^j$  (resp.  $q_k^j$ ) represents the trait value (resp. relative abundance) of lineage  $j$  at  
164 time  $t_k$ . There exist many organisms that reproduce asexually and for which the Price equation  
might be suitable. For example, clonal plants (e.g. *Arabidopsis thaliana*, *Solidago altissima*, North  
166 American *Taraxacum officinale*) and seagrasses (e.g. *Zostera marina*), or crustaceans that undergo  
obligate parthenogenesis (e.g. some morphs of *Daphnia pulex*) are some of the many species for  
168 which distinct genetic lineages might differentially assemble into populations and contribute to  
trait shifts.

170 The reaction norm approach uses the concept of reaction norms originally introduced by R.  
Woltereck ('*Reaktionsnorm*'; Woltereck 1909). Reaction norms have been widely used in quan-  
172 titative genetics to determine genotype-by-environment interactions. A reaction norm gives a  
formal association between a phenotype, its genotype and the environment, by mapping each  
174 genotype onto its phenotype as a function of the environment (Stearns 1989). Stoks et al. (2016)



and Govaert et al. (2016) used mean reaction norms of a population (i.e. average reaction norm  
176 across all individuals or genotypes of that population) to assess the contributions of ancestral  
plasticity, constitutive evolution and evolution of plasticity to population trait change between  
178 two time points. This metric uses population means, and partitions the observed trait change  
between two time points as follows:

$$\Delta\bar{z} = (z_{12} - z_{11}) + (z_{21} - z_{11}) + [(z_{22} - z_{21}) - (z_{12} - z_{11})], \quad (2)$$

180 where  $z_{kl}$  is the average trait value of the population at genetic state  $k$  (i.e. sampled at time point  
 $t_k$ ) in environmental condition  $l$ . This metric thus requires information on the trait values of  
182 representative sets of individuals of both populations in the two environmental conditions that  
correspond to the habitat each population is found in. The first term on the right hand side of  
184 eqn (2) reflects phenotypic plasticity, the second term reflects constitutive evolution, and the last  
term reflects evolution of plasticity.

## 186 **Spatial modification of the Price and reaction norm equation**

### *Approach 1: Deviation from group mean*

188 Contrasts in regression models determine how the model coefficients of categorical variables are  
interpreted. Treatment contrasts, for example, sets a baseline (reference) and compares all subse-  
190 quent levels to this baseline. Depending on the baseline, interpretation of the model coefficients  
can change. Helmert contrasts compare each level against a mean of the preceding levels, and  
192 scaling the contrasts can allow comparing two binary treatment levels to their midpoint (aver-  
age). Eco-evolutionary partitioning among spatially separated populations can in a similar way  
194 be performed by using the same reference for comparisons with all observed populations by con-  
structing a group mean that serves as the baseline. Current eco-evolutionary partitioning metrics  
196 can then still be used to calculate deviations from this midpoint, i.e. the group mean, for each  
observed population. Constructing the group mean can differ depending on the type of met-

198 ric used, and we therefore show how this mean can be constructed when using data applicable  
for the Price equation or the reaction norm approach (Price-Reaction-Norm equation detailed in  
200 Appendix B).

### *The Price equation*

202 We here assume that each population consists of the same  $N$  genetic lineages from which we  
have information on the relative abundances and trait values. While this assumption might be  
204 unlikely in natural landscapes consisting of spatially separated populations, it is used here to  
facilitate illustration of the procedure. A detailed explanation when this assumption is not met  
206 (i.e. when sites differ in the presence and absence of different lineages) is given in Appendix  
C. Constructing a group mean requires calculating average trait values ( $z_a^j$ ) and average relative  
208 abundances ( $q_a^j$ ) of the lineages across the populations, which are calculated as:

$$z_a^j = \frac{1}{m} \sum_{k=1}^m z_k^j \quad \text{and} \quad q_a^j = \frac{1}{m} \sum_{k=1}^m q_k^j, \quad (3)$$

where  $z_k^j$  and  $q_k^j$  denotes the average trait value and relative abundance of lineage  $j$  of Popu-  
210 lation  $k$ . Using the Price equation, we can partition the observed population trait deviation of  
Population  $k$  from the group mean as follows:

$$\Delta \bar{z}_{P_a \rightarrow P_k} = \sum_{j=1}^N z_k^j (q_k^j - q_a^j) + \sum_{j=1}^N q_a^j (z_k^j - z_a^j). \quad (4)$$

212 The first term in the right hand side of eqn (4) refers to the trait deviation due to lineage sorting  
and the second term refers to the trait deviation due to within-lineage trait deviation.

### *The reaction norm approach*

The construction of the group mean for the reaction norm approach can be seen as an average  
216 population assumed to originate from an average environmental condition (see Appendix D for  
a graphical explanation of creating this group mean). In this case we assume that the set of  
218  $m$  populations can be subdivided into two groups based on an environmental conditions (e.g.

populations in which a specific predator is present or absent or populations experiencing high  
220 or low nutrients). In order to construct this group mean we need to calculate  $z_{al}$  (i.e. the average  
trait value of the average population in environmental condition  $l \in \{1, 2\}$ ),  $z_{ka}$  (i.e. the average  
222 trait value of Population  $k$  in the average environmental condition  $a$ ), and  $z_{aa}$  (i.e. the average  
trait value of the average population in the average environmental condition  $a$ ) as follows:

$$z_{al} = \frac{1}{m} \sum_{k=1}^m z_{kl}, \quad z_{ka} = \frac{z_{k1} + z_{k2}}{2} \quad \text{and} \quad z_{aa} = \frac{1}{m} \sum_{k=1}^m z_{ka}. \quad (5)$$

224 The reaction norm equation can then be used to partition the observed trait deviation of Popula-  
tion  $k$  from the average population as:

$$\Delta \bar{z}_{P_a \rightarrow P_k} = (z_{al} - z_{aa}) + (z_{ka} - z_{aa}) + ([z_{kl} - z_{ka}] - [z_{al} - z_{aa}]). \quad (6)$$

226 The first term on the right hand side of eqn (6) is the plasticity component, the second term is the  
trait deviation due to genetic trait differentiation, and the third term is the trait deviation due to  
228 a genetic differentiation in plasticity. It is important to keep in mind that the plasticity compo-  
nent does not reflect the absolute amount of plasticity but rather reflects the average phenotypic  
230 plasticity response. Note that as the last component on the right hand side of eqn (6) approaches  
zero for a certain Population  $k$ , the more similar degree of plasticity the population has with the  
232 group mean. The greater this value is, the more genetically differentiated the population is in its  
plasticity response compared to the group mean.

### 234 *Approach 2: Average of components in both directions*

Calculating eco-evolutionary deviations of each observed population from a group mean pro-  
236 vides insight into the variation in non-evolutionary and evolutionary contributions among the  
set of populations. However, one may also compare pairs of populations and then summarise  
238 the observed non-evolutionary and evolutionary contributions among all pairs of sites to get  
an overall magnitude effect of evolution and ecology. We therefore propose a second modifi-  
240 cation to determine the relative contribution of different eco-evolutionary processes to shifts in

traits among populations that treats each population as a reference. Consider for example two  
242 populations inhabiting spatially distinct sites. One could calculate non-evolutionary and evolutionary components to the trait divergence (i.e.  $\Delta\bar{z}$ ) using first the population at site 1 as a  
244 reference, and subsequently using the population at site 2 as a reference. Absolute values of the non-evolutionary and evolutionary components obtained from both calculations are then averaged  
246 to quantify the overall relative importance of evolution and ecology. We here formulate how this approach translates to the two types of eco-evolutionary partitioning metrics between  
248 pairs of spatially separated populations (in what follows the populations used in the pairwise comparison are stated as Population 1 and Population 2).

### 250 *The Price equation*

The Price equation given by eqn (1), assumes Population 1 to be the reference, and partitions  
252 the observed trait shift from Population 1 to Population 2 for a trait  $z$  (i.e.  $\Delta\bar{z}_{1\rightarrow 2} = \bar{z}_2 - \bar{z}_1$ ) into evolutionary and non-evolutionary contributions. Using Population 2 as a reference and  
254 partitioning a trait shift from Population 2 to Population 1, using the Price equation, partitions an observed trait difference  $\Delta\bar{z}_{2\rightarrow 1} = \bar{z}_1 - \bar{z}_2$  as follows:

$$\Delta\bar{z}_{2\rightarrow 1} = \sum_{j=1}^N z_1^j (q_1^j - q_2^j) + \sum_{j=1}^N q_2^j (z_1^j - z_2^j) \quad (7)$$

256 The first term on the right hand side of equation (1) and (7) gives the change in the relative abundances of the lineages, either  $z_2^j (q_2^j - q_1^j)$  in eqn (1) or  $z_1^j (q_1^j - q_2^j)$  in eqn (7). These two terms  
258 only differ in the trait value that is multiplied with the change in relative abundances of the lineages, which is either  $z_2^j$  in eqn (1) or  $z_1^j$  in eqn (7). Averaging the absolute values of these two  
260 terms gives the overall magnitude of lineage sorting to the trait divergence between Population 1 and 2, i.e.

$$\frac{|\sum_{j=1}^N z_2^j (q_2^j - q_1^j)| + |\sum_{j=1}^N z_1^j (q_1^j - q_2^j)|}{2}, \quad (8)$$

Similarly, one can calculate the overall magnitude of the trait difference within genetic lineages by averaging the absolute values of the two last terms in equation (1) and (7), i.e.

$$\frac{|\sum_{j=1}^N q_1^j (z_2^j - z_1^j)| + |\sum_{j=1}^N q_2^j (z_1^j - z_2^j)|}{2}, \quad (9)$$

262 Dividing eqn (8) and (9) by their sum gives the overall relative importance of each process.

### *The reaction norm approach*

264 The reaction norm approach given in eqn (2), partitions observed population trait change from one time point to the next into an ancestral plasticity, constitutive evolution and evolution of  
266 plasticity component. For two spatially separated populations, however, we can calculate the different components using either Population 1 or Population 2 as reference. Partitioning trait  
268 divergence from Population 1 to Population 2, hence using Population 1 as a reference, is given by eqn (2). When using Population 2 as a reference, the observed trait difference equals  $\Delta \bar{z}_{2 \rightarrow 1} =$   
270  $z_{11} - z_{22}$  and can be partitioned into the following components:

$$\Delta \bar{z} = (z_{21} - z_{22}) + (z_{12} - z_{22}) + [(z_{22} - z_{21}) - (z_{12} - z_{11})]. \quad (10)$$

The first term on the right hand side of eqn (10) is the plasticity response of Population 2, the  
272 second term is the genetic trait differentiation from Population 2 to 1, and the last term gives the change in plasticity from Population 2 to 1. Averaging the absolute value of the plasticity  
274 components of eqn (2) and eqn (10) then gives the absolute magnitude of plasticity to the trait difference between Population 1 and 2:

$$\frac{|z_{12} - z_{11}| + |z_{21} - z_{22}|}{2}. \quad (11)$$

276 Similarly, averaging the genetic trait differentiation components and the genetic differentiation in plasticity components of eqn (2.2) and eqn (2.11) gives the absolute magnitude of genetic trait  
278 differentiation:

$$\frac{|z_{21} - z_{11}| + |z_{12} - z_{22}|}{2}, \quad (12)$$

and of genetic differentiation in plasticity, respectively:

$$|[(z_{22} - z_{21}) - (z_{12} - z_{11})]|. \quad (13)$$

280 Note that the genetic differentiation in plasticity is the same value in both directions, so the  
average of the absolute values of genetic differentiation in plasticity in both directions equals the  
282 absolute value of one direction.

### *Approach 3: Partitioning metrics for undirected trait change*

284 Approach 1 introduces a direction in the study system by constructing a group mean. This  
provides a common reference from which ecological and evolutionary contributions to trait devi-  
286 ations can be quantified. Approach 2 eliminates directionality by averaging the obtained contri-  
butions of ecology and evolution from the two possible directions of trait change between a pair  
288 of populations. Thus, both Approach 1 and 2 still use eco-evolutionary partitioning metrics for  
directed trait change. We here propose a third modification in which we explore ways to math-  
290 ematically modify partitioning metrics to make them independent of a reference. The nature  
of this modification depends on the metric itself, and hence the interpretation of the resulting  
292 components also differs. The modification suggested here is used for pairwise comparison, and  
we denote the two populations used in the pairwise comparison as Population 1 and Population  
294 2.

#### *The Price equation*

The Price equation can be used to separate trait change between populations into a lineage  
sorting and a within-lineage trait change component. Depending on whether we partition the  
trait change from Population 1 to Population 2 (as in eqn (1)) or vice versa (as in eqn (7)),  
the contribution of lineage sorting equals the difference in relative abundances of the lineages  
between both populations multiplied with the trait value of the lineages of either Population  
1 ( $z_1^j$ ) or Population 2 ( $z_2^j$ ). Multiplying this term instead with an average lineage trait value

$(z_1^j + z_2^j)/2$  as opposed to the lineage trait value of either Population 1 or 2, would result in a component of lineage sorting independent of the reference population. Similarly, the within-lineage trait change component (second term in eqn (1) and eqn (7)) can be made independent of the reference by using the average relative abundance of the lineages of the two populations. This results in a spatial version of the Price equation that is independent of the reference chosen, and partitions observed trait divergence between two spatially separated populations as:

$$\Delta \bar{z} = \sum_{j=1}^N \left( \frac{z_1^j + z_2^j}{2} \right) (q_2^j - q_1^j) + \sum_{j=1}^N \left( \frac{q_1^j + q_2^j}{2} \right) (z_2^j - z_1^j) \quad (14)$$

296 The first term on the right hand side of eqn (14) quantifies the observed trait divergence due to differences in relative abundances of the lineages between the two sites, while the second term  
298 quantifies observed trait divergence due to differences in trait values within lineages.

### *The reaction norm approach*

300 As opposed to the spatial modification for the Price equation, we did not find a way to combine the plasticity, the constitutive evolution and evolution of plasticity components assessed from  
302 both directions (given in eqn (2) and (10)) to construct a spatial version for the reaction norm approach. The formula for evolution of plasticity is the same in both directions, and thus aver-  
304 aging would result in the same formula. However, taking an average plasticity and constitutive evolution component results in the same equation, implying that this metric would always lead  
306 to the conclusion that the contribution of plasticity and of genetic trait differentiation are equal, and thus becomes meaningless.

308 An alternative metric using reaction norms is provided by Ellner et al. (2011). While originally Ellner et al. (2011) quantified the ecological (impact of an environmental factor) and evolutionary  
310 (impact of the genetic component of a trait) to the change in an ecological response variable (e.g. population growth), this metric can also be used to partition the shift in a phenotypic trait  $z$  into  
312 main effects of evolution and ecology, i.e.

$$\Delta \bar{z} = \frac{1}{2} \left[ (z_{12} - z_{11}) + (z_{22} - z_{21}) \right] + \frac{1}{2} \left[ (z_{21} - z_{11}) + (z_{22} - z_{12}) \right], \quad (15)$$

Similar as in the reaction norm approach,  $z_{kl}$  represents the trait value of the population at time  
314  $t_k$  or site  $k$  in environmental condition  $l$ . A key difference between eqn (15) and the reaction norm  
approach presented by Govaert et al. (2016) is that the approach presented in Ellner et al. (2011)  
316 does not differentiate evolution into a component of constitutive evolution and a component of  
evolution of plasticity. The interpretation of the components of both approaches is thus different.  
318 The first term on the right hand side of eqn (15) sums the trait change in Population 1 (first part  
of the first term) and Population 2 (second part of the first term) due to a change in environ-  
320 mental condition from 1 to 2 divided by two, and can be seen as an average plasticity effect. The  
second term in eqn (15) sums the trait change in environment 1 (first part of the second term) and  
322 environment 2 (second part of the second term) between both populations divided by two, and  
can be seen as an average effect of genetic trait differentiation. This metric thus only estimates  
324 average effects of genetic trait differentiation and environmental (plasticity) and does not capture  
the full spectrum of evolutionary change (cf. evolution of plasticity is likely half included in each  
326 of the evolutionary and environmental components; Ellner et al. 2011). However, the advantage  
of this equation is that the contributions of evolution and ecology are the same (i.e. equal mag-  
328 nitude, but opposite in sign), and thus independent from whether one partitions trait shift from  
Population 1 to Population 2 or vice versa. This metric might thus be very suitable to quantify  
330 evolutionary and non-evolutionary contributions to spatially (undirected) trait shifts, at least if  
quantification of evolution of plasticity is not important.

## 332 **Application to empirical examples**

Some spatial study systems do imply a directed trait change among spatially separated popula-  
334 tions, such as studies investigating invasion history (e.g. stickleback colonisation of freshwater  
lakes; Bell et al. 2004; Le Rouzic et al. 2011), looking at range expansions where the peripheral  
336 population can be traced back to more central populations (e.g. Safriel et al. 1994; Volis et al.  
2001; Swaegers et al. 2014) or using space-for-time substitutions to evaluate for example climate



338 change (i.e. studies that infer temporal trends from populations that differ in age or in some  
temporally associated sequence; e.g. Etterson and Shaw 2001; Blois et al. 2013). We subsequently  
340 focus on studies that do not imply such a direction (but see Appendix E for an application of  
eco-evolutionary partitioning metrics to a study by Etterson and Shaw 2001). We applied eco-  
342 evolutionary partitioning metrics to three studies, illustrating which eco-evolutionary questions  
the modified metrics can address. In a first application to evolving meta-populations of *Ambystoma*  
344 *maculatum*, we determine whether contributions of plasticity and evolution depend on  
the selection pressure experienced (data obtained from Urban 2008). In a second application, we  
346 determine whether *Daphnia* species vary in their evolutionary and non-evolutionary responses  
to experimental environmental variation (data obtained from Weider et al. 2008). Last, we com-  
348 pared eco-evolutionary responses in two studies that evaluated a similar selection pressure, the  
addition of a predator species, to *Daphnia magna* in an experimental and a natural setting, to  
350 assess whether trait divergence in time and space can be structured by the same ecological and  
evolutionary processes (data obtained from De Meester 1996 and Cousyn et al. 2001).

352 *Example 1: Do relative contributions of plasticity and evolution in a metapopulation of Ambystoma maculatum vary depending on the selection pressure experienced?*  
354

We evaluated whether *A. maculatum* populations originating from habitats with or without a  
356 predator (*A. opacum*) differed in the relative importance of plasticity and genetic trait differenti-  
ation for their deviation from the overall population mean larval size. Other possible research  
358 questions in a metapopulation could include, for example, how repeatable the contributions of  
plasticity and evolution to trait shift are when comparing an average predator-free *A. maculatum*  
360 population to each individual *A. maculatum* population co-existing with a predator or alterna-  
tively all pairs of predator-free and predator-present populations could be compared. These  
362 questions (addressed in Appendix E) would use different populations as reference points than

the example presented here. We used the reaction norm equation from Approach 1 on a metapopulation of 18 *A. maculatum* populations originating from habitats varying in predation pressure (i.e. absence or presence of the predator *A. opacum*) collected by Urban (2008). Measurements of larval body mass of the 18 *A. maculatum* populations were assessed in a control and predator kairomone condition, which allows the construction of reaction norms (Fig. 4A). Using the reaction norm approach, we calculated contributions of plasticity, genetic trait differentiation and genetic differentiation in plasticity to shifts in prey body mass as measured in the laboratory for all 18 populations. Figure 4B and 4C show two alternative ways of visualising these results. If a division in groups of populations (here: those with and without predators) can be made, box-plots can be used to visualise differences in the relative contributions of the components between the two groups (Fig. 4B). However, one can also visualise the results in a triangle plot, which shows the actual values of the relative contribution of the three components for all 18 populations (Fig. 4C). Using different symbols for populations that originate from habitats with and without predator illustrates how these two groups differ in contributions of plasticity, genetic trait differentiation and genetic differentiation in plasticity to their trait deviation from the mean. Overall, plasticity contributed most to the observed deviations in mean prey body mass across the metapopulation, while genetic differentiation in plasticity had the smallest relative contribution. After categorising the 18 populations by whether or not they came from habitats with or without predation, we found that genetic differentiation in prey body mass varied significantly more in the populations where the predator was present compared to populations without predators (Levene's test:  $F_{1,16} = 10.06$ ,  $p = 0.006$ ; Fig. 4B), and that the relative contribution of genetic differentiation in plasticity to body size was significantly larger in larvae originating from sites with predators compared to larvae from sites without predators ( $t$ -test:  $t_{16} = -2.21$ ,  $p = 0.042$ ; Fig. 4B). The narrow range in the relative contribution of genetic trait differentiation in prey body mass of the predator-free populations is depicted in the triangle plot by the grey zone (Fig. 4C).

388 *Example 2: Do relative contributions of clonal sorting and phenotypic plasticity*  
390 *vary among species and treatments?*

390 We used the study by Weider et al. (2008) to quantify among-species variation in non-evolutionary  
and evolutionary contributions to shifts in age at first reproduction in an experiment involving  
392 three species of *Daphnia* cultured in a full-factorial design of high and low food quality and  
quantity. This example illustrates that spatially modified partitioning metrics can also be used to  
394 compare experimental treatments. In this example, we choose to construct a group mean (as op-  
posed to pairwise comparisons among treatments) as this allows to associate non-evolutionary  
396 and evolutionary contributions to a single treatment effect. In an earlier study (Govaert et al.  
2016), the same experimental data was used to determine the role of clonal and species sorting to  
398 temporal trait change in age at first reproduction in each experimental food condition using the  
Price-Reaction-Norm equation. While we would here use the Price-Reaction-Norm equation to  
400 assess non-evolutionary and evolutionary contributions to deviations in age at first reproduction,  
we cannot assess genetic trait differentiation and genetic differentiation in plasticity for this data  
402 set due to the experimental set-up. Hence, we decided to use a Price equation with interaction  
component to assess contributions of lineage sorting, within-lineage trait differentiation (here due  
404 to phenotypic plasticity) and their interaction to deviations in age at first reproduction for three  
*Daphnia* species (*D. pulex*, *D. pulicaria* and their hybrid) for four food conditions (LL: low-quality  
406 low-quantity; HL: high-quality low-quantity; LH: low-quality high-quantity; HH: high-quality  
high-quantity) at day 30 of a 90-day microcosm experiment. By plotting the absolute deviation  
408 from the average for the three components across treatments and species, we were able to de-  
tect whether species vary in the relative importance of these processes to the observed response  
410 to the experimental treatments and whether this variation among species differed among food  
conditions (Fig. 5). Overall, we found that within-lineage trait differentiation was the larger con-  
412 tributor (Fig. 5). Contributions of lineage sorting, within-lineage trait differentiation and their  
interaction were in opposite direction between the LL and HH treatments for all species except *D.*

414 *pulicaria*. *D. pulex* and the hybrid species showed similar direction of the contributions for lineage  
sorting and within-lineage trait differentiation, where lower food quality was in opposite direc-  
416 tion to high food quality conditions. By applying partitioning metrics to different species, we  
found that species varied in how the components were associated among treatments, indicating  
418 that different species may use different processes to respond to an environmental condition.

*Example 3: Are spatial and temporal trait divergence structured by the same*  
420 *processes? - A case study in Daphnia*

De Meester (1996) and Cousyn et al. (2001) measured phenotypic responses in phototactic be-  
422 haviour to different fish predation pressures (i.e. none, low and high) for three *Daphnia magna*  
(sub)populations in space and time (resurrection ecology approach), respectively. This provides  
424 an opportunity to investigate the similarity with respect to the importance of eco-evolutionary  
components in time and space. De Meester (1996) measured *D. magna* populations inhabiting  
426 different spatial locations with differing fish predation pressure (none, low, and high), while  
Cousyn et al. (2001) considered a single population that experienced temporal shifts in fish pre-  
428 dation pressure (from none early 1970s to high fish predation pressure late 1970s and low mid  
1980s). Both studies measured trait values for phototactic behaviour using a common garden  
430 experiment, exposing *D. magna* individuals of different clones from each (sub)population to a  
fish kairomone (mimicking high fish predation pressure) and a control (absence of fish preda-  
432 tion threat) treatment. From these experiments, reaction norms could be constructed for each  
(sub)population (Fig. 6A-B), allowing the use of the reaction norm approach. These data sets  
434 have been previously used to illustrate the similarity of responses in phototactic behaviour in  
time and space by Freeman and Herron (2007), and we here explicitly quantify the importance  
436 of non-evolutionary and evolutionary processes in both the spatial and temporal setting. To fa-  
cilitate this comparison, it was important to apply the same modification of the reaction norm  
438 approach for both data sets. In other words, although the resurrection ecology reconstruction

of Cousyn et al. (2001) allows application of a directional partitioning metric (see Stoks et al.  
440 2016), we chose to apply an undirected metric to enable direct comparison of the magnitudes  
of the components with the spatial study. We used the reaction norm approach as described in  
442 Approach 1 to calculate deviations of populations from the overall group mean (e.g. the mean  
across all individuals from all populations within a study). By comparing the (sub)populations  
444 to this group mean, we could assess if (sub)populations experiencing a similar predation pres-  
sure also similarly deviated from the group mean in their non-evolutionary and evolutionary  
446 contributions. To test the latter, we performed a bootstrap analysis resampling the data with  
replacement, and recalculating the contributions of plasticity, genetic trait differentiation and ge-  
448 netic differentiation in plasticity. We then compared the 95% confidence intervals of the relative  
(Fig. 6C) and absolute (Fig. 6D-L) contributions of plasticity, genetic trait differentiation and ge-  
450 netic differentiation in plasticity between pairs of (sub)populations that experienced similar fish  
predation pressure. We found that all 95% confidence intervals obtained from the bootstrapping  
452 overlapped for the absolute contributions of plasticity, genetic trait differentiation and genetic  
differentiation in plasticity, indicating a similar range of the absolute contributions of these pro-  
454 cesses between pairs of (sub)populations that experienced similar fish predation pressure. We  
thus found that a shared selection pressure resulted in a similar allocation of trait change across  
456 the ecological, evolutionary, and eco-evolutionary contributions and this result was independent  
on the approach used (detailed in Appendix F). Our analysis thus suggests that in this case adap-  
458 tation through time and across space is achieved through similar combinations of mechanisms.  
This also suggests that the spatial differentiation observed in De Meester (1996) could in principle  
460 be achieved in a time span of a few years (the time span of the resurrection ecology study).

## Discussion

462 The phenotypic distribution of spatially separated populations and communities can be struc-  
tured by non-evolutionary (phenotypic plasticity at the individual level; species sorting at the

464 community level) and evolutionary (genetic differentiation) processes (Via and Lande 1985; Kawecki  
and Ebert 2004; Fox and Harder 2015; Govaert et al. 2016; Logan et al. 2016). However, evolution-  
466 ary and non-evolutionary contributions to trait divergence among populations or communities  
separated in space cannot always be quantified using the same methods as for population or com-  
468 munity trait change in time. Temporal studies may ask how evolutionary and non-evolutionary  
processes combine to structure trait shifts from one time point to the next, while a spatial study  
470 instead seeks to quantify evolutionary and non-evolutionary contributions to among-site trait  
divergence. While spatial studies cannot reconstruct how traits changed through time or assess  
472 changes in community composition resulting from species extinctions and colonizations medi-  
ated through evolution (a temporal process), they can quantify to what extent plasticity, genetic  
474 trait differentiation and species sorting combine to explain among-site differences in trait values.  
In this study, we illustrated three ways to adjust the Price equation (Price 1970; Price 1972), the  
476 reaction norm approach (Ellner et al. 2011; Govaert et al. 2016) and the Price-Reaction-Norm  
equation (Govaert et al. 2016) to match spatial, undirected comparisons of trait shifts. We then  
478 applied some of the metrics to published case studies of empirical data to illustrate the diverse  
array of questions that can be addressed when the metrics are matched to the question of interest.

480 We presented three approaches to quantify ecological and evolutionary contributions to spa-  
tial trait divergence using existing partitioning metrics. The first approach involves constructing a  
482 group mean that represents a known ancestral state or control treatment, and evaluating how in-  
dividual sub-populations differ from that group average. The choice of the group mean depends  
484 on the researcher's question – it could represent a metapopulation average, or a global mean  
across all levels of an experiment. Once the partition analysis is conducted and eco-evolutionary  
486 contributions to trait shifts from the group average are calculated for each sub-population, these  
contributions can be compared among sub-populations, but can also be linked to population-  
488 specific characteristics. For example, among-population genetic differentiation is expected when  
sub-populations are spatially isolated (Wright 1943; Bohonak 1999), and the degree of evolution-  
490 ary trait shift can be compared with the population's degree of spatial isolation. More specific

eco-evolutionary hypotheses, for example whether or not populations with a longer history of  
492 exposure to a selection pressure (Ghalambor et al. 2007; Oostra et al. 2018) or different selection  
pressures (Huang and Agrawal 2016), or with a different degree of environmental variability  
494 (Reed et al. 2010; Chevin and Hoffmann 2017) demonstrate a larger fraction of genetic evolution  
versus plasticity could be tested by comparing the different fractions to these site properties. The  
496 second and third approach we presented do not require designating an ancestral or control refer-  
ence. They instead use different methods of averaging and consider comparisons between pairs  
498 of populations. The second approach calculates the ecological and evolutionary components of  
among-population trait differences by treating each population in the pair as the reference, then  
500 averaging the two resulting absolute values for each component. It thus produces an overall  
assessment of how the importance of evolutionary and non-evolutionary processes varies among  
502 a set of spatially separated populations or communities. The third approach also does not re-  
quire choosing one population as the initial state. Depending on the metric used, it instead  
504 averages either the two population's trait values and/or abundance values when calculating  
eco-evolutionary components. Because in the second approach, the averaging is across absolute  
506 values of the resulting ecological and evolutionary contributions, the resulting eco-evolutionary  
fractions do not sum to the single observed difference in traits between the two populations.

508 These spatial eco-evolutionary partitioning metrics were applied to data from three existing  
studies to illustrate how they can answer eco-evolutionary research questions. Spatial parti-  
510 tioning metrics can identify spatial structure in the relative contributions of evolutionary and  
non-evolutionary processes to trait variation in natural landscapes. Spatial variation in abiotic  
512 conditions and ecological interactions may result in spatially divergent selection strengths, pro-  
ducing distinct evolutionary trajectories among populations (and between coevolving species,  
514 i.e. the geographic mosaic of coevolution, Thompson 1999; Thompson 2005). These different  
selection pressures in a heterogeneous landscape might result in varying contributions of non-  
516 evolutionary and evolutionary processes, and these contributions could further depend on the  
population or community identity, or on the focal species studied. The case study of Urban (2008)



518 indicated that populations of *A. maculatum* living in the presence of the predator *A. opacum* had  
substantially higher contributions of genetic differentiation in plasticity and showed larger vari-  
520 ation in their genetic trait differentiation than populations living in the absence of the predator.  
The populations living in the absence of the predator showed a strikingly narrow range in the  
522 relative contribution of genetic trait differentiation in larval body size. Similarly, the case study of  
Weider et al. (2008) indicated that eco-evolutionary contributions differed depending on experi-  
524 mental treatments, but also among species, although there is currently no clear expectations for  
when this dependence is more or less likely. Nevertheless, the indication of context-dependent  
526 eco-evolutionary processes is important for future research in the field of eco-evolutionary dy-  
namics.

528 It currently is unknown to what extent the magnitude of eco-evolutionary contributions to  
population and community trait change are predictable and repeatable. In this study we used  
530 spatial eco-evolutionary partitioning metrics to compare how *D. magna* traits responded to the  
presence of fish predators, and found a similarity in eco-evolutionary responses in phototactic  
532 behaviour between populations with spatial variation in this selection pressure and populations  
with temporal variation. Although the similarity in spatial and temporal trait shifts has pre-  
534 viously been explored for the *D. magna* populations used in this study (Freeman and Herron  
2007), our application explores whether eco-evolutionary contributions to spatial and temporal  
536 trait shifts are also repeatable in space and time. This is an intriguing possibility, because it has  
previously been hypothesized that trait evolution dynamics in space and time can be similar (e.g.  
538 Frank 1991; Gandon et al. 2008). Our results indicate this similarity may also be reflected when  
considering both plastic and genetic trait responses to selection pressures. We anticipate further  
540 comparative studies are needed to establish whether this is a repeatable pattern.

Directionality is not always lacking in spatial research studies. Studies that use space-for-  
542 time substitutions to evaluate how traits shift from cooler to warmer climates (Etterson and  
Shaw 2001; Dinh Van et al. 2014; Janssens et al. 2014) and studies that compare trait shifts from  
544 an ancestral to an invasive populations are some examples where this directionality of the trait



shift is clear (Bell et al. 2004; Le Rouzic et al. 2011). These studies can thus use existing partition-  
546 ing metrics (that assign an ancestral and dependent state) to understand how eco-evolutionary  
processes contribute to these trait shifts. Integrating the assessment of contributions of genetic  
548 and non-genetic variation to the expected trait change can potentially inform future conservation  
planning (Moritz 2002). For instance, if the expected trait change is mainly due to plasticity and  
550 increases the organism's fitness, it is more likely that the population will experience a short-term  
positive response to the changing environment. This provides time for the population to genet-  
552 ically respond to the changing environment, which might eventually be essential for its future  
persistence (Bradshaw and Holzapfel 2006; Gienapp et al. 2008). However, if the expected trait  
554 change is mainly due to evolution, conservation management can take the amount of genetic  
variation and evolutionary potential in the target populations into consideration. Conservation  
556 of evolutionary potential means taking measures to maintain or increase genetic diversity (such  
as habitat restoration or creation, supporting a well-connected metapopulation), while taking the  
558 risk of outbreeding depression into account (Fenster and Dudash 1994). It is important to realize  
that the genetic structure of the population changes as it adapts to the environmental change,  
560 and this might impact its future response to other stressors (e.g. in the case of genetic erosion;  
Harlan 1975; Bijlsma and Loeschcke 2012). Conservation efforts that focus only on species diver-  
562 sity may potentially overlook the importance of intraspecific and genetic trait variation and how  
this can influence ecological dynamics (Lande 1988; Moritz 1994; Hughes et al. 1997; Frankham  
564 et al. 2002; Moritz 2002; Palkovacs et al. 2012; Des Roches et al. 2018).

Intraspecific trait variation might be critical for population dynamics, community structure  
566 and ecosystem functioning in a wide range of settings (Mimura et al. 2017; Des Roches et al.  
2018). However, the importance of intraspecific variation is likely to vary. Some important ques-  
568 tions that remain to be answered next are: how much of this intraspecific trait variation is due  
to genetic trait variation?, and to what extent does the ecological importance of genetic trait  
570 variation differ across landscapes properties such as connectivity, across biotic and abiotic envi-  
ronmental gradients, and in response to interactions with other species? The approaches outlined

572 here to convert existing eco-evolutionary partitioning metrics to appropriately accommodate spa-  
tially structured (undirected) trait data will facilitate future attempts to determine associations  
574 between among-site variation in evolutionary and non-evolutionary components and properties  
of the landscape, the environment or the study species. Numerous studies compare trait dis-  
576 tributions among communities (Cornwell and Ackerly 2009; Vellend 2016; Kenitz et al. 2018) or  
population genetic structure among populations (Marten et al. 2006; Gomez-Uchida et al. 2009;  
578 Short and Caterino 2009; Olsen et al. 2011; Ackerman et al. 2013). However, there are very few  
studies that collected the necessary data to decompose all potential sources of trait shifts at the  
580 community level. We anticipate an increase in the number of studies that attempt to combine  
surveys of genetic and non-genetic trait variation at the population level with species composi-  
582 tion and associated trait shifts at the community level. The data gathered by such studies can be  
used to quantify the contributions of evolutionary and non-evolutionary processes to among-site  
584 variation in community trait values, quantifying the structure of the evolving metacommunity.  
We therefore predict an increasing scope for the application of the metrics proposed in this study.

## 586 **Acknowledgments**

This research was supported by KU Leuven Research Fund projects PF/2010/07 and C16/17/002,  
588 Belspo IUAP project SPEEDY P7/04, FWO projects G0B9818 and G0C3818, KU Leuven Research  
Fund F+ 13036 fellowship awarded to JHP, and an IWT PhD fellowship awarded to LG. LG was  
590 also supported by the University of Zurich Research Priority Program on 'Global Change and  
Biodiversity'.

592 **Figure legends**

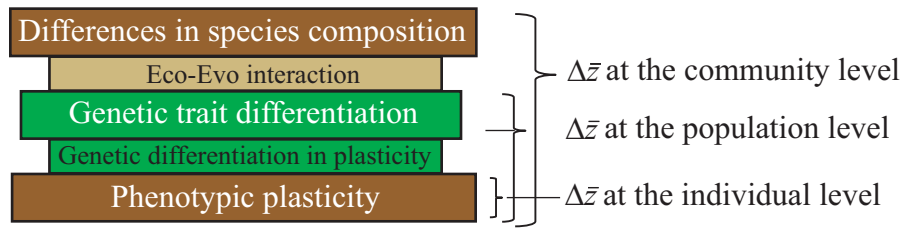

Figure 1: Visualisation of the ‘eco-evo sandwich’ modified from Govaert et al. (2016) to a spatial study. Community trait divergence can be separated in plasticity effects at the individual level (brown bar), genetic trait differentiation at the population level (green bar), differences in species composition at the community level (i.e. species sorting; brown bar) and interactions between these non-evolutionary and evolutionary processes. These interactions may involve genetic differentiation in plasticity (smaller green bar) which is an evolutionary process, and a species sorting  $\times$  evolution interaction (smaller light brown bar).

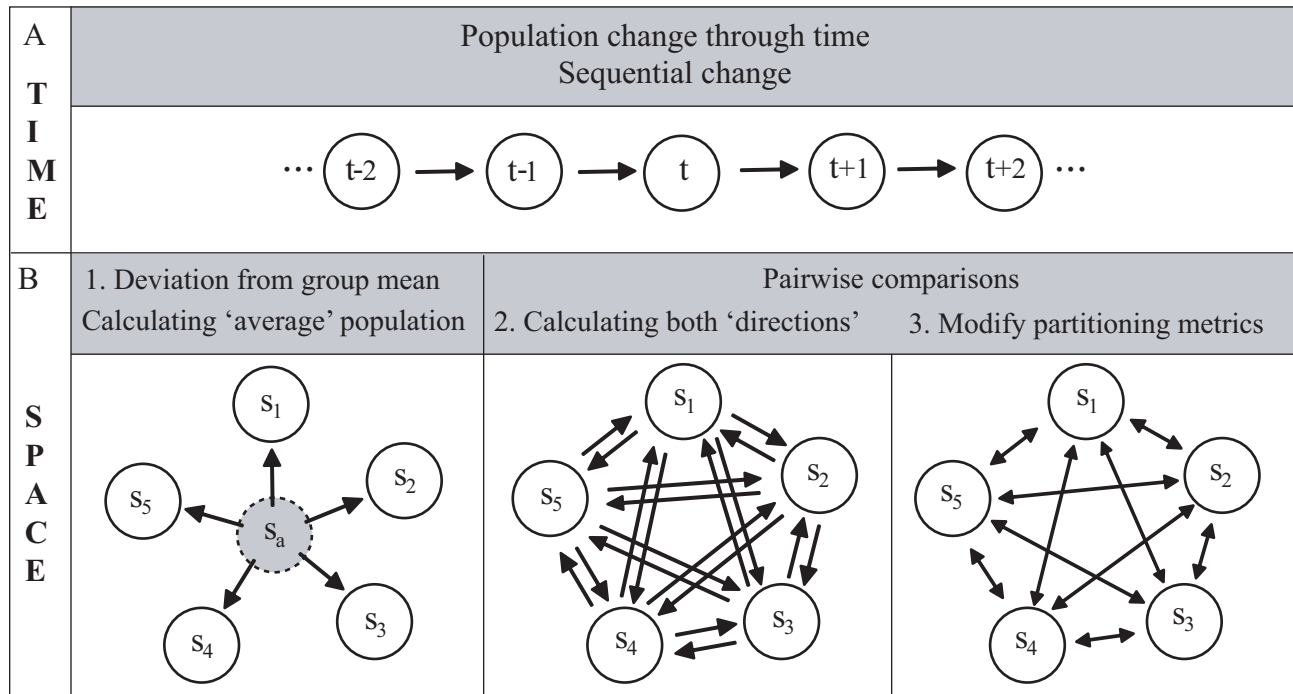

Figure 2: Visual representation of (A) directed trait change in a temporal study system where trait change goes from time  $t - 1$  to  $t$  to  $t + 1$  etc. and (B) trait divergence in spatial study systems here consisting of 5 sites, where non-evolutionary and evolutionary contributions to trait divergence can be estimated either as deviations from a common group mean or known ancestor (Approach 1) or as an averaged change between pairs of sites by calculating the non-evolutionary and evolutionary contributions from e.g. site  $s_1$  to site  $s_2$  and vice versa followed by averaging the absolute values of those quantities and this for all pairwise combinations (Approach 2) or by using partitioning metrics modified to undirected trait change (Approach 3). Arrows do not reflect spatial distances, but directions of trait change to which non-evolutionary and evolutionary contributions are calculated for.

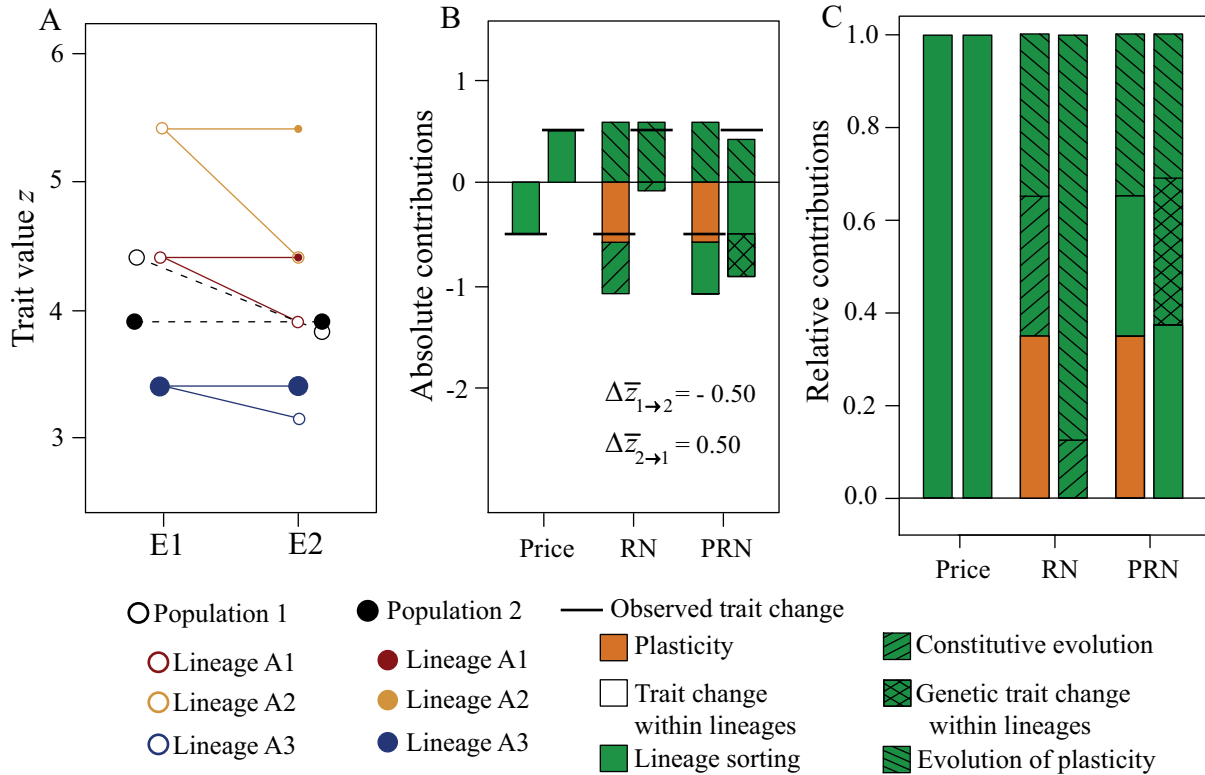

Figure 3: Numerical example displaying shift in a trait  $z$  between Population 1 at site 1 (unfilled black circles) and Population 2 at site 2 (filled black circles) in which the populations consist of the same three genetic lineages (indicated by blue, red, yellow color). The populations differ in environmental condition  $E$ , i.e. Population 1 (resp. 2) originated from an environmental condition  $E_1$  (resp.  $E_2$ ). Individuals of the three lineages were measured for trait  $z$  in both environmental conditions in order to construct reaction norms. (A) Visualisation of the reaction norms of the three lineages, where the unfilled (resp. filled) circles represent the average trait value  $z$  of the genetic lineage at site 1 (resp. 2) at environmental condition  $E_1$  and  $E_2$ . The black unfilled (resp. filled) circles represent the average trait value of the total population calculated as a lineage abundance-weighted mean using the lineage trait values and lineage relative abundances (given by the size of the symbols). (B) Absolute and (C) relative contributions of the evolutionary and non-evolutionary components to the average trait shift from Population 1 to Population 2 ( $\Delta \bar{z}_{1 \rightarrow 2}$ ) and vice versa ( $\Delta \bar{z}_{2 \rightarrow 1}$ ) using the Price equation (Price), the reaction norm approach (RN) and the Price-Reaction-Norm equation (PRN). In (B) the vertical bar represents the observed trait difference between Population 1 at  $E_1$  and Population 2 at  $E_2$ , either calculated as  $\Delta \bar{z}_{1 \rightarrow 2} = z_2 - z_1$  or  $\Delta \bar{z}_{2 \rightarrow 1} = z_1 - z_2$ .

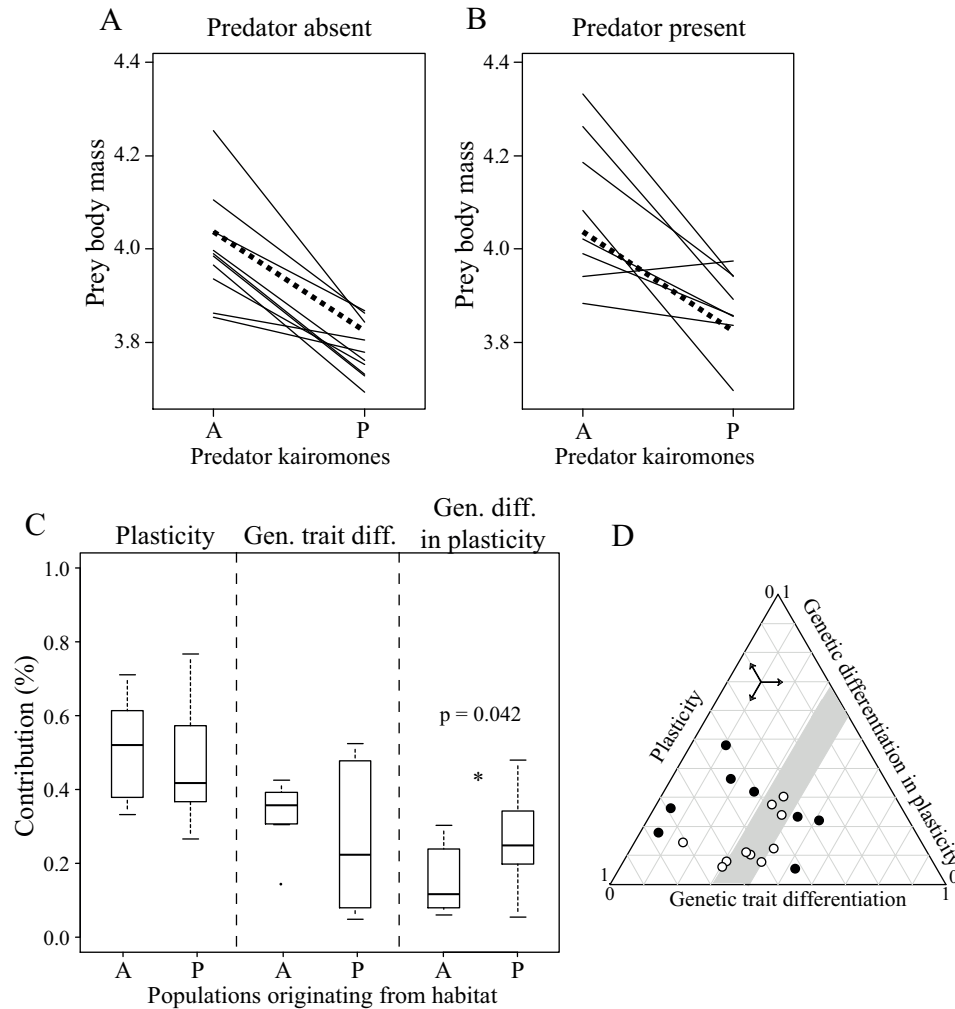

Figure 4: (A,B) Reaction norms for larval body mass of 18 populations of *A. maculatum* originating from sites where the predator *A. opacum* is either present or absent. Body mass of the larvae were measured in the absence (A) and presence (P) of predator kairomones. The dashed black line gives the group mean for all 18 populations. (C) Boxplots of the relative contributions of plasticity, genetic trait differentiation and genetic differentiation in plasticity relative to deviation in mean larval body mass using the reaction norm approach as described in Approach 1. Results are presented separately for the populations originating from habitats without (A) and with (P) the predator *A. opacum*. (D) Triangle plot showing the relative contributions of plasticity, genetic trait differentiation and genetic differentiation in plasticity. Filled (resp. unfilled) circles represent the *A. maculatum* populations originating from sites where the predator *A. opacum* is present (resp. absent). Data were extracted from Figure 3 in Urban (2008). Arrows on the triangle plot indicate how to read the coordinates of the points on the graph.

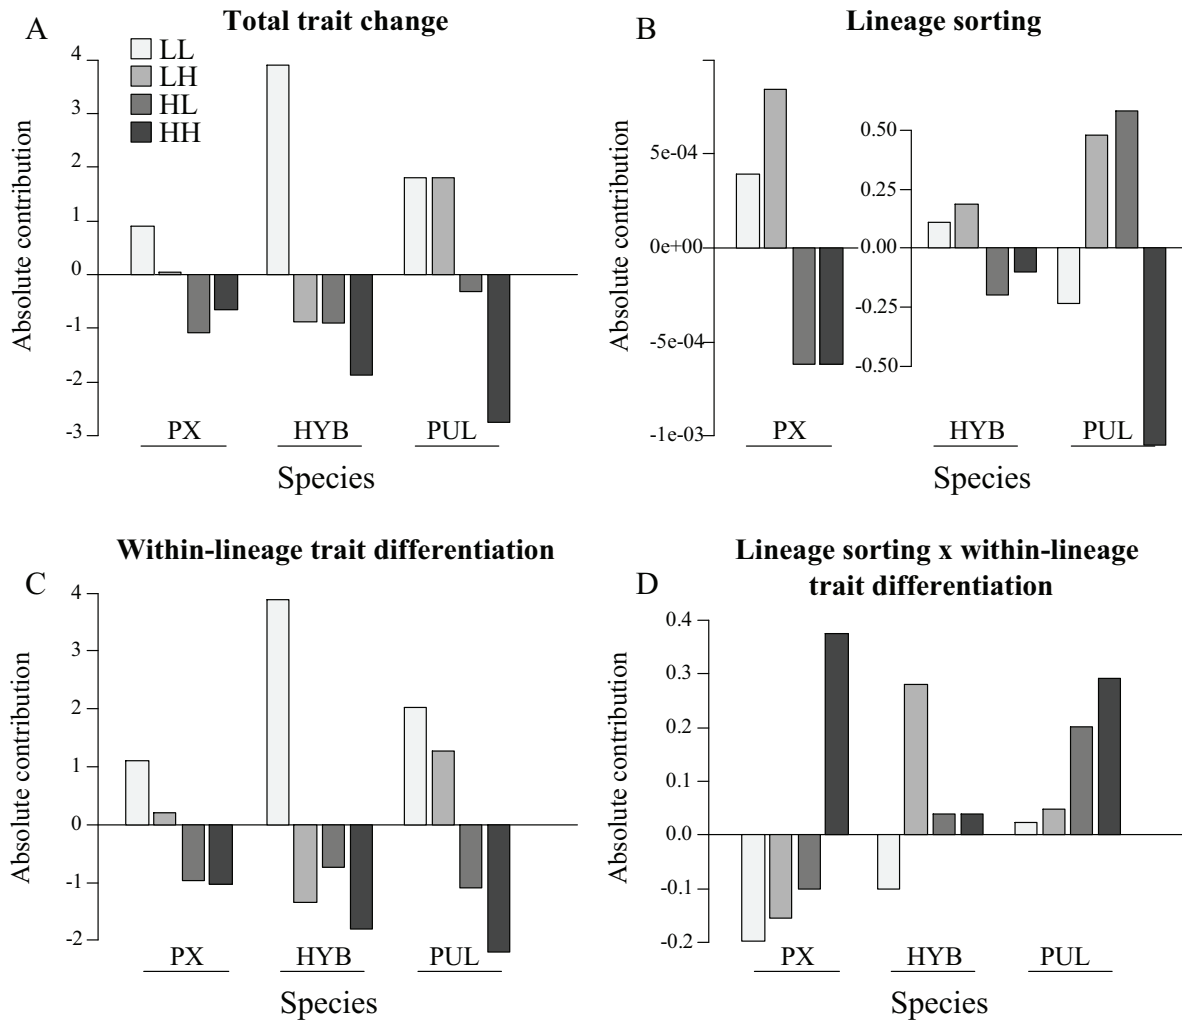

Figure 5: Graphical visualisation of (A) the total trait deviation from the group mean for each species (PX - *Daphnia pulex*, PUL - *Daphnia Pulicaria* and HYB - their hybrid) and treatment (low-quality low-quantity (LL), low-quality high-quantity (LH), high-quality low-quantity (HL), and high-quality high-quantity (HH)) and the absolute contributions of (B) shifts in lineage composition, (C) trait differentiation within lineages and (D) their interaction using the reaction norm approach.

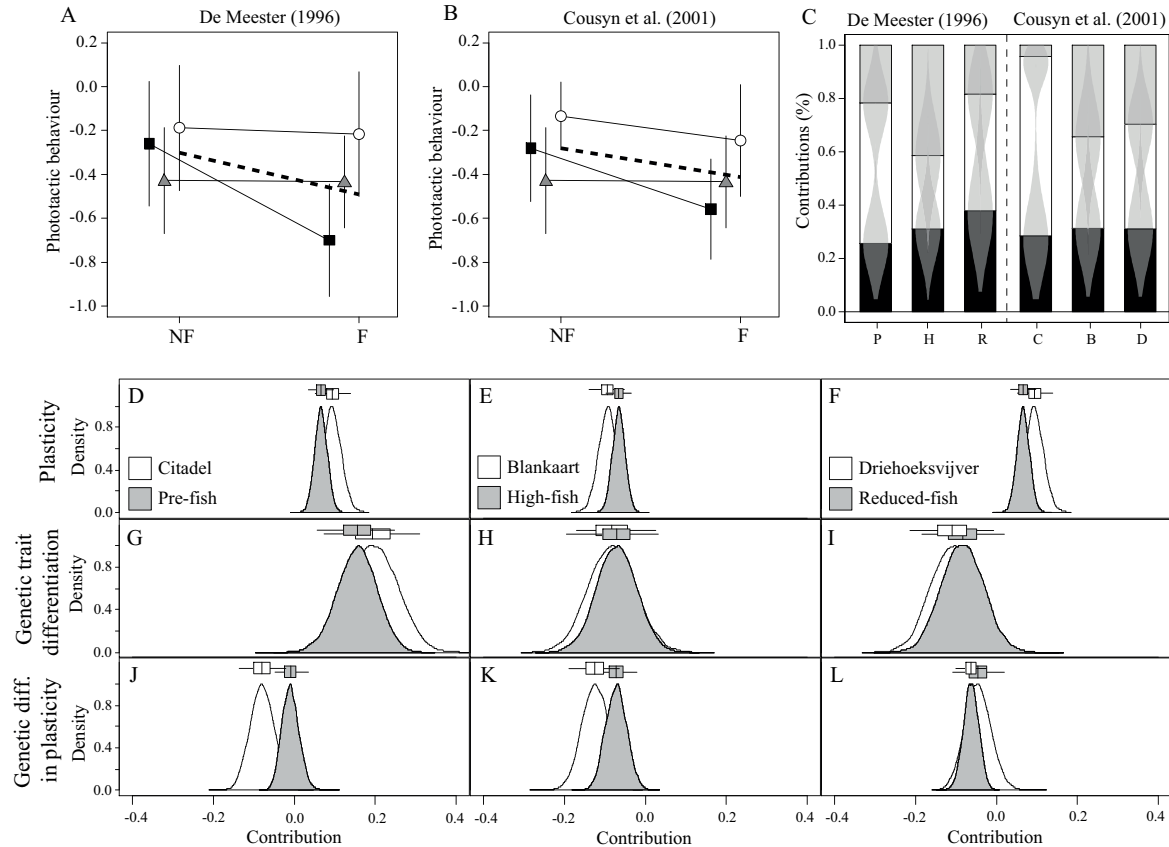

Figure 6: Reaction norms of phototactic behaviour of three *D. magna* populations (A) originating from three different ponds corresponding to no (Citadelpark, C; circles), high (Blankaart, B; squares) and low fish predation pressure (Driehoeksvijver, D; triangles) and (B) from the same pond Oud-Heverlee Zuid at three different time periods corresponding to no (Pre-fish; circles), high (High-fish; squares) and reduced (Reduced-fish; triangles) fish predation pressure measured in a control (NF) and fish kairomone (F) condition (data obtained from Figure 1 in De Meester 1996 and from Figure 2 in Cousyn et al. 2001). (C) Relative contributions of plasticity (black), genetic trait differentiation (white) and genetic differentiation in plasticity (grey) and their density distribution obtained from bootstrap analysis given as a violin plot within the bars (shaded grey area) to observed difference in phototactic behaviour from the group mean to each population from De Meester (1996) - (population C, B, or D) - and from Cousyn et al. (2001) - Pre-fish (P), High-fish (H) or Reduced-fish (R) - using the reaction norm approach as explained in Approach 1. (D-L) Bootstrap distributions of the absolute contributions of plasticity (D-F), genetic trait differentiation (G-I) and genetic differentiation<sup>32</sup> in plasticity (J-L) for the populations from De Meester (1996) (white), and from Cousyn et al. (2001) (grey).



## Literature Cited

- 594 Ackerman, M. W., W. D. Templin, J. E. Seeb, and L. W. Seeb. 2013. Landscape heterogeneity and  
local adaptation define the spatial genetic structure of pacific salmon in a pristine environment.  
596 *Conservation Genetics* 14:483–498.
- Barraclough, T. G. 2015. How do species interactions affect evolutionary dynamics across whole  
598 communities? *Annual Review of Ecology, Evolution, and Systematics* 46:25–48.
- Becks, L., S. P. Ellner, L. E. Jones, and N. G. Hairston. 2012. The functional genomics of an  
600 eco-evolutionary feedback loop: linking gene expression, trait evolution, and community dy-  
namics. *Ecology letters* 15:492–501.
- 602 Bell, M. A., W. E. Aguirre, and N. J. Buck. 2004. Twelve years of contemporary armor evolution  
in a threespine stickleback population. *Evolution* 58:814–824.
- 604 Bijlsma, R., and V. Loeschcke. 2012. Genetic erosion impedes adaptive responses to stressful  
environments. *Evolutionary Applications* 5:117–129.
- 606 Bohonak, A. J. 1999. Dispersal, gene flow, and population structure. *The Quarterly Review of*  
*Biology* 74:21–45.
- 608 Bradshaw, W. E., and C. M. Holzapfel. 2006. Evolutionary response to rapid climate change.  
*Science* 312:1477–1478.
- 610 Chevin, L.-M., and A. A. Hoffmann. 2017. Evolution of phenotypic plasticity in extreme environ-  
ments. *Philosophical Transactions of the Royal Society B: Biological Sciences* 372:20160138.
- 612 Collins, S., and A. Gardner. 2009. Integrating physiological, ecological and evolutionary change:  
a Price equation approach. *Ecology letters* 12:744–757.
- 614 Cornwell, W. K., and D. D. Ackerly. 2009. Community assembly and shifts in plant trait distribu-

- tions across an environmental gradient in coastal California. *Ecological Monographs* 79:109–  
616 126.
- Cousyn, C., L. De Meester, J. Colbourne, L. Brendonck, D. Verschuren, and F. Volckaert. 2001.  
618 Rapid, local adaptation of zooplankton behavior to changes in predation pressure in the ab-  
sence of neutral genetic changes. *Proceedings of the National Academy of Sciences* 98:6256–  
620 6260.
- Day, T., and S. Gandon. 2006. Insights from Price's equation into evolutionary epidemiology.  
622 *Disease evolution: models, concepts, and data analyses* 71:23.
- De Meester, L. 1996. Local genetic differentiation and adaptation in freshwater zooplankton  
624 populations: patterns and processes. *Ecoscience* 3:385–399.
- Des Roches, S., D. M. Post, N. E. Turley, J. K. Bailey, A. P. Hendry, M. T. Kinnison, J. A. Schweitzer,  
626 and E. P. Palkovacs. 2018. The ecological importance of intraspecific variation. *Nature ecology  
& evolution* 2:57.
- 628 Dinh Van, K., L. Janssens, S. Debecker, and R. Stoks. 2014. Temperature- and latitude-specific  
individual growth rates shape the vulnerability of damselfly larvae to a widespread pesticide.  
630 *Journal of Applied Ecology* 51:919–928.
- Ellner, S. P., M. A. Geber, and N. G. Hairston. 2011. Does rapid evolution matter? Measuring  
632 the rate of contemporary evolution and its impacts on ecological dynamics. *Ecology Letters*  
14:603–614.
- 634 Etterson, J. R., and R. G. Shaw. 2001. Constraint to adaptive evolution in response to global  
warming. *Science* 294:151–154.
- 636 Fenster, C. B., and M. R. Dudash. 1994. Genetic considerations for plant population restora-  
tion and conservation. *Restoration of endangered species: conceptual issues, planning and*  
638 *implementation pages* 34–62.

- 640 Fox, J. W. 2006. Using the Price equation to partition the effects of biodiversity loss on ecosystem function. *Ecology* 87:2687–2696.
- 642 Fox, J. W., and L. D. Harder. 2015. Using a “time machine” to test for local adaptation of aquatic microbes to temporal and spatial environmental variation. *Evolution* 69:136–145.
- 644 Fox, J. W., and B. Kerr. 2012. Analyzing the effects of species gain and loss on ecosystem function using the extended Price equation partition. *Oikos* 121:290–298.
- 646 Frank, S. A. 1991. Spatial variation in coevolutionary dynamics. *Evolutionary Ecology* 5:193–217.
- 648 Frankham, R., D. A. Briscoe, and J. D. Ballou. 2002. Introduction to conservation genetics. Cambridge university press.
- 650 Freeman, S., and J. C. Herron. 2007. Evolutionary analysis. QH 366.2. F73 2007. Pearson Prentice Hall Upper Saddle River, New Jersey.
- 652 Gandon, S., A. Buckling, E. Decaestecker, and T. Day. 2008. Host–parasite coevolution and patterns of adaptation across time and space. *Journal of evolutionary biology* 21:1861–1866.
- 654 Ghalambor, C. K., J. K. McKay, S. P. Carroll, and D. N. Reznick. 2007. Adaptive versus non-adaptive phenotypic plasticity and the potential for contemporary adaptation in new environments. *Functional ecology* 21:394–407.
- 656 Gienapp, P., C. Teplitsky, J. Alho, J. Mills, and J. Merilä. 2008. Climate change and evolution: disentangling environmental and genetic responses. *Molecular ecology* 17:167–178.
- 658 Gómez, P., S. Paterson, L. De Meester, X. Liu, L. Lenzi, M. Sharma, K. McElroy, and A. Buckling. 2016. Local adaptation of a bacterium is as important as its presence in structuring a natural microbial community. *Nature communications* 7.
- 660 Gomez-Uchida, D., T. W. Knight, and D. E. Ruzzante. 2009. Interaction of landscape and life history attributes on genetic diversity, neutral divergence and gene flow in a pristine community of salmonids. *Molecular Ecology* 18:4854–4869.
- 662

- Govaert, L. 2018. Eco-evolutionary partitioning metrics: a practical guide for biologists. Belgian  
664 *Jurnal of Zoology* 148:167–202.
- Govaert, L., J. H. Pantel, and L. De Meester. 2016. Eco-evolutionary partitioning metrics: assessing  
666 the importance of ecological and evolutionary contributions to population and community  
change. *Ecology letters* 19:839–853.
- 668 Hairston, N. G., S. P. Ellner, M. A. Geber, T. Yoshida, and J. A. Fox. 2005. Rapid evolution and  
the convergence of ecological and evolutionary time. *Ecology Letters* 8:1114–1127.
- 670 Harlan, J. R. 1975. Our vanishing genetic resources. *Science* 188:618–621.
- Hendry, A. P. 2017. *Eco-evolutionary dynamics*. Princeton University Press.
- 672 Huang, Y., and A. F. Agrawal. 2016. Experimental evolution of gene expression and plasticity in  
alternative selective regimes. *PLoS genetics* 12:e1006336.
- 674 Hughes, J. B., G. C. Daily, and P. R. Ehrlich. 1997. Population diversity: its extent and extinction.  
*Science* 278:689–692.
- 676 Janssens, L., K. Dinh Van, S. Debecker, L. Bervoets, and R. Stoks. 2014. Local adaptation and  
the potential effects of a contaminant on predator avoidance and antipredator responses under  
678 global warming: a space-for-time substitution approach. *Evolutionary applications* 7:421–430.
- Kawecki, T. J., and D. Ebert. 2004. Conceptual issues in local adaptation. *Ecology letters* 7:1225–  
680 1241.
- Kenitz, K. M., A. W. Visser, M. D. Ohman, M. R. Landry, and K. H. Andersen. 2018. Community  
682 trait distribution across environmental gradients. *Ecosystems* pages 1–13.
- Lande, R. 1988. Genetics and demography in biological conservation. *Science* 241:1455–1460.
- 684 Le Rouzic, A., K. Østbye, T. O. Klepaker, T. F. Hansen, L. Bernatchez, D. Schluter, and L. A.  
Vøllestad. 2011. Strong and consistent natural selection associated with armour reduction in  
686 sticklebacks. *Molecular ecology* 20:2483–2493.

- 688 Logan, M. L., M. Duryea, O. R. Molnar, B. J. Kessler, and R. Calsbeek. 2016. Spatial variation in  
climate mediates gene flow across an island archipelago. *Evolution* 70:2395–2403.
- 690 Marten, A., M. Braendle, and R. Brandl. 2006. Habitat type predicts genetic population differen-  
tiation in freshwater invertebrates. *Molecular Ecology* 15:2643–2651.
- 692 Mimura, M., T. Yahara, D. P. Faith, E. Vázquez-Domínguez, R. I. Colautti, H. Araki, F. Javadi,  
J. Núñez-Farfán, A. S. Mori, S. Zhou, et al. 2017. Understanding and monitoring the conse-  
quences of human impacts on intraspecific variation. *Evolutionary applications* 10:121–139.
- 694 Moritz, C. 1994. Applications of mitochondrial DNA analysis in conservation: a critical review.  
*Molecular Ecology* 3:401–411.
- 696 ———. 2002. Strategies to protect biological diversity and the evolutionary processes that sustain  
it. *Systematic biology* 51:238–254.
- 698 Norberg, J., M. C. Urban, M. Vellend, C. A. Klausmeier, and N. Loeuille. 2012. Eco-evolutionary  
responses of biodiversity to climate change. *Nature Climate Change* 2:747.
- 700 Olsen, J. B., P. A. Crane, B. G. Flannery, K. Dunmall, W. D. Templin, and J. K. Wenburg. 2011.  
Comparative landscape genetic analysis of three pacific salmon species from subarctic North  
702 America. *Conservation Genetics* 12:223–241.
- Oostra, V., M. Saastamoinen, B. J. Zwaan, and C. W. Wheat. 2018. Strong phenotypic plasticity  
704 limits potential for evolutionary responses to climate change. *Nature communications* 9:1005.
- Palkovacs, E., M. Kinnison, C. Correa, C. Dalton, and A. Hendry. 2012. Ecological consequences  
706 of human-induced trait change: fates beyond traits. *Evolutionary Applications* 5:183–191.
- Price, G. R. 1970. Selection and covariance. *Nature* 227:520–21.
- 708 ———. 1972. Extension of covariance selection mathematics. *Annals of human genetics* 35:485–  
490.

- 710 Queller, D. C. 2017. Fundamental theorems of evolution. *The American Naturalist* 189:345–353.
- Reed, T. E., R. S. Waples, D. E. Schindler, J. J. Hard, and M. T. Kinnison. 2010. Phenotypic plas-  
712 ticity and population viability: the importance of environmental predictability. *Proceedings of  
the Royal Society B: Biological Sciences* 277:3391–3400.
- 714 Safriel, U. N., S. Volis, and S. Kark. 1994. Core and peripheral populations and global climate  
change. *Israel Journal of Plant Sciences* 42:331–345.
- 716 Schoener, T. W. 2011. The newest synthesis: understanding the interplay of evolutionary and  
ecological dynamics. *science* 331:426–429.
- 718 Short, A. Z., and M. Caterino. 2009. On the validity of habitat as a predictor of genetic structure  
in aquatic systems: a comparative study using California water beetles. *Molecular Ecology*  
720 18:403–414.
- Stearns, S. C. 1989. The evolutionary significance of phenotypic plasticity. *Bioscience* 39:436–445.
- 722 Stoks, R., L. Govaert, K. Pauwels, B. Jansen, and L. De Meester. 2016. Resurrecting complexity:  
the interplay of plasticity and rapid evolution in the multiple trait response to strong changes  
724 in predation pressure in the water flea *Daphnia magna*. *Ecology letters* 19:180–190.
- Swaegers, J., J. Mergeay, L. Therry, D. Bonte, M. Larmuseau, and R. Stoks. 2014. Unravelling the  
726 effects of contemporary and historical range expansion on the distribution of genetic diversity  
in the damselfly *Coenagrion scitulum*. *Journal of evolutionary biology* 27:748–759.
- 728 terHorst, C. P., J. T. Lennon, and J. A. Lau. 2014. The relative importance of rapid evolution for  
plant-microbe interactions depends on ecological context. *Proceedings of the Royal Society of  
730 London B: Biological Sciences* 281:20140028.
- Thompson, J. N. 1999. Specific hypotheses on the geographic mosaic of coevolution. *The american  
732 naturalist* 153:S1–S14.

- . 2005. The geographic mosaic of coevolution. University of Chicago Press.
- 734 Urban, M. C. 2008. The evolution of prey body size reaction norms in diverse communities.  
Journal of animal ecology 77:346–355.
- 736 Vellend, M. 2016. The theory of ecological communities (MPB-57), vol. 75. Princeton University  
Press.
- 738 Via, S., and R. Lande. 1985. Genotype-environment interaction and the evolution of phenotypic  
plasticity. Evolution 39:505–522.
- 740 Volis, S., S. Mendlinger, and N. Orlovsky. 2001. Variability in phenotypic traits in core and  
peripheral populations of wild barley *Hordeum spontaneum* Koch. Hereditas 133:235–247.
- 742 Weider, L. J., P. D. Jeyasingh, and K. G. Looper. 2008. Stoichiometric differences in food quality:  
impacts on genetic diversity and the coexistence of aquatic herbivores in a *Daphnia* hybrid  
744 complex. Oecologia 158:47–55.
- Woltereck, R. 1909. Weitere experimentelle Untersuchungen über Artveränderung, speziell über  
746 das Wesen quantitativer Artunterschiede bei Daphnien. Verhandlungen der deutschen zoolo-  
gischen Gesellschaft 19:110–173.
- 748 Wright, S. 1943. Isolation by distance. Genetics 28:114.
